# Supplementary material
Source: Research Square preprint supplement (doi:10.21203/rs.3.rs-8873515/v1)
Supplement: Supplementary file 1 [file b8f5bad4fffde5e2543a3b9c.xlsx]

## Sheet: Table 1
Table 1: Iron force constant ⟨F⟩ values in synthesized almandine and andradite at high pressure
Sample	Pressure (GPa)	error	<F> (N/m)	error
Almandine	2.13	0.13	109.2	11.4
	8.46	0.44	123.1	12.5
	15.23	0.23	163.7	15.1
	21.67	0.44	175	18.6
	28.27	0.08	191.6	21.8
Andradite	1.08	0.03	182.8	15.6
	9.37	0.29	231.1	24.9
	15.53	0.48	240.3	15.4
	25.37	0.37	255.9	17.9

## Sheet: Table 2
Table 2: Modelled co-evolution of Fe isotopes and Fe³⁺/ΣFe ratios in melts produced by partial melting of a MORB mantle source
			Fe isotope fractionation during partial melting of the MORB mantle source was modelled following the framework of Dauphas et al. (2014) (see their Supplementary Equations S12–S37), with modifications to several key parameters. The procedure involved three main steps: (1) We first reproduced the calculation scheme of Dauphas et al. (2014) to provide a benchmark for comparison. This step included i…
Step 1
			Equations from Dauphas 2014 EPSL
							A					B					C					D
													E
	Values for parameters from Dauphas 2014 EPSL
		R0		0.043												note: Fe3+/Fe2+
		K2		1				f	1 - f	(1 - f)^K3	(1 - f)^K2	(1 - f)^(K2 - K3)		(1 - f)^(K3 - K2)		Rcl		A	B	C	D	E	δs - δ0	δcl - δ0
		K3		4.5				0.01	0.99	0.955781	0.99	1.0358		0.965435		0.190142		-0.0114764	0.00142602	-0.00136821	-0.00183346	86.6366	-0.000316626	0.0274314
								0.05	0.95	0.793882	0.95	1.19665		0.835666		0.177261		-0.0580914	0.0067981	-0.00654004	-0.00874041	16.7191	-0.00151838	0.025386
		<F> of basaltic melt						0.1	0.9	0.622431	0.9	1.44594		0.69159		0.162355		-0.118157	0.0127964	-0.0123477	-0.0164525	7.97317	-0.00288092	0.02297
		Fe2+ endmember		199	N/m			0.15	0.85	0.481266	0.85	1.76618		0.566195		0.148704		-0.180565	0.0180464	-0.0174595	-0.0232026	5.0532	-0.00409807	0.0207084
		Fe3+ endmember		351	N/m			0.2	0.8	0.366357	0.8	2.18366		0.457947		0.136233		-0.245744	0.0226008	-0.0219158	-0.0290582	3.58973	-0.00518086	0.0185979
								0.3	0.7	0.200882	0.7	3.48463		0.286974		0.11454		-0.386512	0.0298368	-0.0290377	-0.0383616	2.11937	-0.00698978	0.014814
		<F> of mantle minerals						0.4	0.6	0.100388	0.6	5.97683		0.167313		0.0967083		-0.545758	0.0349325	-0.0340842	-0.0449132	1.37757	-0.00840433	0.0115775
		Fe2+ endmember		197	N/m			0.5	0.5	0.0441942	0.5	11.3137		0.0883883		0.0821993		-0.731455	0.0383077	-0.0374409	-0.0492527	0.927556	-0.00952718	0.008837
		Fe3+ endmember		255	N/m			0.6	0.4	0.0161909	0.4	24.7053		0.0404772		0.0705063		-0.956653	0.0403622	-0.0394897	-0.0518942	0.623842	-0.0104696	0.0065314
								0.7	0.3	0.00443655	0.3	67.6201		0.0147885		0.061156		-1.24544	0.0414655	-0.0405917	-0.0533128	0.404129	-0.0113629	0.00459207
		T		1300	℃			0.8	0.2	0.000715542	0.2	279.508		0.00357771		0.0537115		-1.65139	0.0419473	-0.0410734	-0.0539323	0.237293	-0.0123982	0.00294201
				1573.15	K			0.9	0.1	3.16228e-05	0.1	3162.28		0.000316228		0.0477763		-2.34467	0.0420876	-0.0412136	-0.0541126	0.106046	-0.0140256	0.00148736
								0.99	0.01	1e-09	0.01	1e+07		1e-07		0.0434343		-4.64727	0.0421012	-0.0412272	-0.0541301	0.00968054	-0.0193373	0.000187196
		K3/(K2 - K3)		-1.28571
		K3 - K2		3.5
		K2 - K3		-3.5
		R0/(1 + R0)		0.0412272	note: Fe3+/∑Fe
		△2l-2s		0.00230564
		△3l-2l		0.175229
		△3s-2s		0.0668636
									Figure 7 from Dauphas 2014 EPSL
Step 2
	REVISED Values for parameters in this study
																	note: Fe3+/∑Fe
		R0		0.036												note: Fe3+/Fe2+
		K2		1				f	1 - f	(1 - f)^K3	(1 - f)^K2	(1 - f)^(K2 - K3)		(1 - f)^(K3 - K2)		Rcl		A	B	C	D	E	δs - δ0	δcl - δ0
		K3		4.5				0.01	0.99	0.955781	0.99	1.0358		0.965435		0.159189	0.137328	-0.0112521	0.00120181	-0.00116075	-0.00154519	88.3729	-0.000819945	0.0724609
								0.05	0.95	0.793882	0.95	1.19665		0.835666		0.148405	0.129227	-0.0570201	0.00572682	-0.00554368	-0.00736306	17.0424	-0.00408141	0.0695572
		<F> of basaltic melt						0.1	0.9	0.622431	0.9	1.44594		0.69159		0.135925	0.11966	-0.116135	0.0107748	-0.0104566	-0.0138533	8.12032	-0.0081317	0.066032
		Fe2+ endmember		193	N/m			0.15	0.85	0.481266	0.85	1.76618		0.566195		0.124496	0.110713	-0.177708	0.0151891	-0.0147732	-0.0195288	5.14201	-0.0121774	0.0626161
		Fe3+ endmember		362	N/m			0.2	0.8	0.366357	0.8	2.18366		0.457947		0.114056	0.102379	-0.242159	0.0190155	-0.0185303	-0.0244485	3.64968	-0.0162483	0.0593009
								0.3	0.7	0.200882	0.7	3.48463		0.286974		0.0958942	0.0875031	-0.381764	0.0250891	-0.0245236	-0.0322574	2.15116	-0.0246061	0.0529315
		<F> of solid mantle						0.4	0.6	0.100388	0.6	5.97683		0.167313		0.0809651	0.0749008	-0.540188	0.0293619	-0.0287618	-0.0377511	1.39601	-0.033543	0.0468262
		Fe2+ endmember		149	N/m			0.5	0.5	0.0441942	0.5	11.3137		0.0883883		0.068818	0.064387	-0.725337	0.0321902	-0.0315771	-0.0413874	0.93859	-0.0435322	0.0408589
		Fe3+ endmember		266	N/m			0.6	0.4	0.0161909	0.4	24.7053		0.0404772		0.0590285	0.0557384	-0.950202	0.033911	-0.033294	-0.0435999	0.630425	-0.0553025	0.0348641
								0.7	0.3	0.00443655	0.3	67.6201		0.0147885		0.0512004	0.0487066	-1.23881	0.0348349	-0.0342169	-0.0447877	0.407914	-0.0701374	0.0286101
		T		1300	℃			0.8	0.2	0.000715542	0.2	279.508		0.00357771		0.0449678	0.0430327	-1.64468	0.0352384	-0.0346203	-0.0453065	0.239273	-0.0908102	0.0217284
				1573.15	K			0.9	0.1	3.16228e-05	0.1	3162.28		0.000316228		0.0399987	0.0384604	-2.33794	0.0353558	-0.0347377	-0.0454574	0.106839	-0.126	0.0134617
								0.99	0.01	1e-09	0.01	1e+07		1e-07		0.0363636	0.0350877	-4.64054	0.0353671	-0.034749	-0.045472	0.00974659	-0.2428	0.00236647
		K3/(K2 - K3)		-1.28571
		K3 - K2		3.5
		K2 - K3		-3.5
		R0/(1 + R0)		0.034749	note: Fe3+/∑Fe
		△2l-2s		0.0507241
		△3l-2l		0.194827
		△3s-2s		0.13488
Step 3
	REVISED Values for parameters in this study-including the PRESSURE effect																						note: Fe3+/∑Fe
		R0		0.036																		note: Fe3+/Fe2+
		K2		1										f	1 - f	(1 - f)^K3	(1 - f)^K2	(1 - f)^(K2 - K3)		(1 - f)^(K3 - K2)		Rcl		A	B	C	D	E	δs - δ0	δcl - δ0
		K3		4.5										0.01	0.99	0.955781	0.99	1.0358		0.965435		0.159189	0.137328	-0.0112521	0.00120181	-0.00116075	-0.00154519	88.3729	-0.000719875	0.0636174
														0.05	0.95	0.793882	0.95	1.19665		0.835666		0.148405	0.129227	-0.0570201	0.00572682	-0.00554368	-0.00736306	17.0424	-0.0035801	0.0610135
		<F> of basaltic melt at high pressure					Slop	<F> of basaltic melt at room pressure						0.1	0.9	0.622431	0.9	1.44594		0.69159		0.135925	0.11966	-0.116135	0.0107748	-0.0104566	-0.0138533	8.12032	-0.0071249	0.0578565
		Fe2+ endmember		194.09	N/m		1.09	193						0.15	0.85	0.481266	0.85	1.76618		0.566195		0.124496	0.110713	-0.177708	0.0151891	-0.0147732	-0.0195288	5.14201	-0.0106577	0.0548021
		Fe3+ endmember		362	N/m		0	362						0.2	0.8	0.366357	0.8	2.18366		0.457947		0.114056	0.102379	-0.242159	0.0190155	-0.0185303	-0.0244485	3.64968	-0.0142048	0.0518428
														0.3	0.7	0.200882	0.7	3.48463		0.286974		0.0958942	0.0875031	-0.381764	0.0250891	-0.0245236	-0.0322574	2.15116	-0.0214644	0.0461733
		<F> of solid mantle at high pressure					Slop	<F> of solid mantle at room pressure						0.4	0.6	0.100388	0.6	5.97683		0.167313		0.0809651	0.0749008	-0.540188	0.0293619	-0.0287618	-0.0377511	1.39601	-0.0291986	0.0407614
		Fe2+ endmember		153.05	N/m		4.05	149						0.5	0.5	0.0441942	0.5	11.3137		0.0883883		0.068818	0.064387	-0.725337	0.0321902	-0.0315771	-0.0413874	0.93859	-0.0378186	0.0354962
		Fe3+ endmember		266	N/m		0	266						0.6	0.4	0.0161909	0.4	24.7053		0.0404772		0.0590285	0.0557384	-0.950202	0.033911	-0.033294	-0.0435999	0.630425	-0.0479547	0.0302319
														0.7	0.3	0.00443655	0.3	67.6201		0.0147885		0.0512004	0.0487066	-1.23881	0.0348349	-0.0342169	-0.0447877	0.407914	-0.0607141	0.0247661
		T		1365.85	℃									0.8	0.2	0.000715542	0.2	279.508		0.00357771		0.0449678	0.0430327	-1.64468	0.0352384	-0.0346203	-0.0453065	0.239273	-0.0784831	0.0187789
				1639	K									0.9	0.1	3.16228e-05	0.1	3162.28		0.000316228		0.0399987	0.0384604	-2.33794	0.0353558	-0.0347377	-0.0454574	0.106839	-0.108723	0.0116158
		P		1	GPa									0.99	0.01	1e-09	0.01	1e+07		1e-07		0.0363636	0.0350877	-4.64054	0.0353671	-0.034749	-0.045472	0.00974659	-0.209087	0.00203789
		K3/(K2 - K3)		-1.28571
		K3 - K2		3.5
		K2 - K3		-3.5					Modeled results at mantle potential temperature 1350 °C, pressure 1.0–2.8 GPa
		R0/(1 + R0)		0.034749	note: Fe3+/∑Fe
										f	Fe3+/∑Fe	δcl - δ0		δcl - δ0		δcl - δ0		δcl - δ0
		△56Fe(2l-2s)		0.0435864						T		1365.85		1372.85		1383.85		1393.85	℃
		△56Fe(3l-2l)		0.178328								1639		1646		1657		1667	K
		△56Fe(3s-2s)		0.119958						P		1		1.5		2.1		2.8	GPa
	Mantle adiabatic temperature 1350℃ profile (Katsura, 2022)									0.01	0.1373	0.06362		0.06152		0.05887		0.05604
										0.05	0.1292	0.06101		0.05898		0.05639		0.05364
		P-GPa	T(K)	T(℃)						0.1	0.1197	0.05786		0.05589		0.0534		0.05075
		0	1623.5	1350.35						0.15	0.1107	0.0548		0.05291		0.05051		0.04796
		1	1639	1365.85						0.2	0.1024	0.05184		0.05002		0.04772		0.04526
		1.5	1646	1372.85
		2.1	1657	1383.85
		2.8	1667	1393.85
References
Dauphas, N. et al. Magma redox and structural controls on iron isotope variations in Earth’s mantle and crust. Earth Planet. Sci. Lett. 398, 127–140 (2014).
Katsura, T. A revised adiabatic temperature profile for the mantle. J. Geophys. Res. Solid Earth 127, e2021JB023562 (2022).

## Sheet: Table 3
Table 3: Simulated co-evolution of Fe isotopes and Fe3+/∑Fe ratios in melts produced by partial melting of garnet peridotite at a mantle potential temperature of 1550 °C.
				Equations from Dauphas 2014 EPSL
								A					B					C					D
														E
	REVISED Values for parameters in this study-including the PRESSURE effect																						note: Fe3+/∑Fe
		R0		0.4																		note: Fe3+/Fe2+
		K2		1										f	1 - f	(1 - f)^K3	(1 - f)^K2	(1 - f)^(K2 - K3)		(1 - f)^(K3 - K2)		Rcl		A	B	C	D	E	δs - δ0	δcl - δ0	δcl
		K3		4.5										0.01	0.99	0.955781	0.99	1.0358		0.965435		1.76876	0.638828	-0.019975	0.00992471	-0.00712437	-0.0127603	49.5641	-0.00294345	0.14589	0.19589
														0.05	0.95	0.793882	0.95	1.19665		0.835666		1.64894	0.622491	-0.099384	0.0480907	-0.0351899	-0.0618309	9.57027	-0.0144119	0.137926	0.187926
		<F> of basaltic melt at high pressure					Slop	<F> of basaltic melt at room pressure						0.1	0.9	0.622431	0.9	1.44594		0.69159		1.51028	0.601637	-0.197604	0.0922437	-0.0690229	-0.118599	4.57708	-0.0280261	0.128278	0.178278
		Fe2+ endmember		197.142	N/m		1.09	193						0.15	0.85	0.481266	0.85	1.76618		0.566195		1.38329	0.580412	-0.294844	0.132325	-0.101057	-0.170133	2.91615	-0.0407969	0.11897	0.16897
		Fe3+ endmember		362	N/m		0	362						0.2	0.8	0.366357	0.8	2.18366		0.457947		1.26729	0.558944	-0.391411	0.168268	-0.130895	-0.216344	2.08739	-0.0526972	0.11	0.16
														0.3	0.7	0.200882	0.7	3.48463		0.286974		1.06549	0.515854	-0.584481	0.227806	-0.182744	-0.292894	1.25935	-0.0738904	0.0930539	0.143054
		<F> of solid mantle at high pressure					Slop	<F> of solid mantle at room pressure						0.4	0.6	0.100388	0.6	5.97683		0.167313		0.899612	0.473577	-0.782517	0.271691	-0.222987	-0.349318	0.842481	-0.09186	0.0773903	0.12739
		Fe2+ endmember		164.39	N/m		4.05	149						0.5	0.5	0.0441942	0.5	11.3137		0.0883883		0.764645	0.433314	-0.994875	0.301728	-0.251566	-0.387935	0.586722	-0.107274	0.06294	0.11294
		Fe3+ endmember		221.928	N/m		1.56	216						0.6	0.4	0.0161909	0.4	24.7053		0.0404772		0.655873	0.396089	-1.2367	0.320411	-0.269781	-0.411957	0.409126	-0.12124	0.0496022	0.0996022
														0.7	0.3	0.00443655	0.3	67.6201		0.0147885		0.568893	0.362608	-1.53455	0.330574	-0.279834	-0.425024	0.274784	-0.135434	0.0372151	0.0872151
		T		1608.85	℃									0.8	0.2	0.000715542	0.2	279.508		0.00357771		0.499642	0.333174	-1.94448	0.335042	-0.284285	-0.430769	0.166945	-0.152729	0.0254973	0.0754973
				1882	K									0.9	0.1	3.16228e-05	0.1	3162.28		0.000316228		0.44443	0.307686	-2.63893	0.336346	-0.285588	-0.432445	0.0769336	-0.180547	0.0138901	0.0638901
		P		3.8	GPa									0.99	0.01	1e-09	0.01	1e+07		1e-07		0.40404	0.28777	-4.94164	0.336472	-0.285714	-0.432607	0.00719424	-0.271796	0.00195537	0.0519554
		K3/(K2 - K3)		-1.28571
		K3 - K2		3.5				Modeled results for garnet peridotite at mantle potential temperature 1550 °C, pressure 3.8– 21.0 GPa
		K2 - K3		-3.5
		R0/(1 + R0)		0.285714	note: Fe3+/∑Fe				f	Fe3+/∑Fe	δcl		δcl		δcl		δcl		δcl		δcl		δcl		δcl		δcl		δcl
									T		1608.85		1617.85		1626.85		1635.85		1652.85		1669.85		1685.85		1714.85		1818.85		1898.85	℃
		△57Fe(2l-2s)		0.0396139							1882		1891		1900		1909		1926		1943		1959		1988		2092		2172	K
		△57Fe(3l-2l)		0.199398					P		3.8		4.4		5.1		5.8		7.1		8.5		9.9		12.6		17.1		21	GPa
		△57Fe(3s-2s)		0.0695929					R0=0.036
									0.01	0.1373	0.1143		0.1115		0.1084		0.1054		0.09989		0.09424		0.08882		0.0789		0.06285		0.05127
		δ0		0.05	‰				0.05	0.1292	0.1114		0.1087		0.1057		0.1027		0.0974		0.09191		0.08664		0.07698		0.06143		0.05021
									0.1	0.1197	0.1079		0.1053		0.1024		0.09955		0.09441		0.08912		0.08403		0.07472		0.05979		0.04901
	Mantle adiabatic temperature 1550℃ profile (Katsura, 2022)								0.15	0.1107	0.1045		0.102		0.09924		0.09651		0.09156		0.08647		0.08157		0.0726		0.05828		0.04793
									0.2	0.1024	0.1013		0.0989		0.09623		0.09361		0.08885		0.08395		0.07924		0.07061		0.05689		0.04698
		P-GPa	T(K)	T(℃)
		2.8	1867	1593.85					R0=0.06
		3.1	1872	1598.85					0.01	0.2097	0.1271		0.1242		0.121		0.1178		0.112		0.1062		0.1005		0.09016		0.07292		0.06052
		3.8	1882	1608.85					0.05	0.1983	0.1232		0.1204		0.1173		0.1142		0.1087		0.1029		0.09747		0.08745		0.0708		0.05883
		4.4	1891	1617.85					0.1	0.1847	0.1186		0.1159		0.1129		0.11		0.1046		0.09912		0.09385		0.08422		0.06831		0.05686
		5.1	1900	1626.85					0.15	0.1718	0.1142		0.1116		0.1087		0.1059		0.1007		0.09548		0.09042		0.08117		0.06599		0.05505
		5.8	1909	1635.85					0.2	0.1597	0.1099		0.1074		0.1047		0.102		0.09707		0.09202		0.08718		0.07831		0.06384		0.05341
		6.4	1918	1644.85
		7.1	1926	1652.85					R0=0.1
		7.8	1935	1661.85					0.01	0.3066	0.1439		0.1408		0.1374		0.1341		0.128		0.1218		0.1159		0.105		0.08627		0.07284
		8.5	1943	1669.85					0.05	0.2919	0.1389		0.1359		0.1327		0.1294		0.1236		0.1176		0.1119		0.1014		0.08332		0.0704
		9.2	1951	1677.85					0.1	0.2741	0.1329		0.1301		0.1269		0.1239		0.1183		0.1125		0.107		0.09699		0.07981		0.06751
		9.9	1959	1685.85					0.15	0.257	0.1272		0.1244		0.1214		0.1185		0.1132		0.1077		0.1024		0.09281		0.0765		0.0648
		10.6	1966	1692.85					0.2	0.2406	0.1216		0.1191		0.1162		0.1134		0.1083		0.103		0.09803		0.08886		0.07339		0.06229
		11.2	1974	1700.85
		11.9	1981	1707.85					R0=0.15
		12.6	1988	1714.85					0.01	0.3988	0.1594		0.1562		0.1526		0.1491		0.1428		0.1363		0.1302		0.1189		0.09879		0.08445
		13.4	1996	1722.85					0.05	0.3821	0.1535		0.1504		0.147		0.1436		0.1375		0.1313		0.1253		0.1145		0.09515		0.08138
		13.7	1999	1725.85					0.1	0.3616	0.1463		0.1434		0.1401		0.1369		0.1311		0.1251		0.1195		0.1091		0.09078		0.07772
		13.7	2060	1786.85					0.15	0.3416	0.1394		0.1366		0.1335		0.1305		0.1249		0.1193		0.1138		0.104		0.08663		0.07426
		14.1	2063	1789.85					0.2	0.3221	0.1328		0.1302		0.1272		0.1243		0.119		0.1136		0.1085		0.09907		0.0827		0.07099
		14.9	2071	1797.85
		15.6	2078	1804.85					R0=0.25
		16.4	2085	1811.85					0.01	0.525	0.1795		0.1761		0.1724		0.1687		0.1621		0.1554		0.149		0.1373		0.1155		0.1001
		17.1	2092	1818.85					0.05	0.5075	0.1725		0.1692		0.1656		0.1621		0.1558		0.1493		0.1431		0.1319		0.1111		0.0963
		17.9	2099	1825.85					0.1	0.4856	0.1639		0.1608		0.1575		0.1541		0.1481		0.1419		0.136		0.1253		0.1057		0.09172
		17.9	2142	1868.85					0.15	0.4637	0.1557		0.1528		0.1496		0.1464		0.1407		0.1348		0.1292		0.1191		0.1005		0.08734
		18.7	2150	1876.85					0.2	0.442	0.1478		0.145		0.142		0.139		0.1335		0.128		0.1227		0.113		0.09559		0.08316
		19.5	2157	1883.85
		20.3	2165	1891.85					R0=0.4
		21	2172	1898.85					0.01	0.6388	0.1959		0.1924		0.1886		0.1849		0.1782		0.1713		0.1647		0.1529		0.13		0.1139
		21.8	2180	1906.85					0.05	0.6225	0.1879		0.1846		0.181		0.1774		0.1709		0.1643		0.1581		0.1467		0.1248		0.1094
									0.1	0.6016	0.1783		0.1751		0.1717		0.1683		0.1622		0.1559		0.15		0.1392		0.1186		0.1041
									0.15	0.5804	0.169		0.166		0.1627		0.1596		0.1537		0.1478		0.1422		0.132		0.1126		0.09896
									0.2	0.5589	0.16		0.1572		0.1541		0.1511		0.1456		0.14		0.1347		0.1251		0.1069		0.09406

## Sheet: Table 4
Table 4: Simulated co-evolution of Fe isotopes and Fe3+/∑Fe ratios in melts produced by partial melting of eclogite at a mantle potential temperature of 1550 °C.
				Equations from Dauphas 2014 EPSL
								A					B					C					D
														E
	REVISED Values for parameters in this study-including the PRESSURE effect																						note: Fe3+/∑Fe
		R0		0.2																		note: Fe3+/Fe2+
		K2		1										f	1 - f	(1 - f)^K3	(1 - f)^K2	(1 - f)^(K2 - K3)		(1 - f)^(K3 - K2)		Rcl		A	B	C	D	E	δs - δ0	δcl - δ0	δcl
		K3		4.5										0.01	0.99	0.955781	0.99	1.0358		0.965435		0.884381	0.469322	-0.0158278	0.00577744	-0.00482847	-0.00742813	62.6814	-0.00234922	0.147252	0.297252
														0.05	0.95	0.793882	0.95	1.19665		0.835666		0.82447	0.451896	-0.0790644	0.0277711	-0.0234669	-0.0357057	12.1545	-0.0115653	0.140571	0.290571
		<F> of basaltic melt at high pressure					Slop	<F> of basaltic melt at room pressure						0.1	0.9	0.622431	0.9	1.44594		0.69159		0.755138	0.430244	-0.15813	0.0527698	-0.0451558	-0.0678469	5.83707	-0.0226855	0.132417	0.282417
		Fe2+ endmember		202.265	N/m		1.09	193						0.15	0.85	0.481266	0.85	1.76618		0.566195		0.691645	0.40886	-0.237567	0.0750477	-0.0649463	-0.0964899	3.72912	-0.0333819	0.124485	0.274485
		Fe3+ endmember		362	N/m		0	362						0.2	0.8	0.366357	0.8	2.18366		0.457947		0.633643	0.387871	-0.31783	0.0946868	-0.0827621	-0.12174	2.67277	-0.0436905	0.116775	0.266775
														0.3	0.7	0.200882	0.7	3.48463		0.286974		0.532745	0.347576	-0.483188	0.126513	-0.112387	-0.16266	1.6097	-0.0633683	0.102004	0.252004
		<F> of solid mantle at high pressure					Slop	<F> of solid mantle at room pressure						0.4	0.6	0.100388	0.6	5.97683		0.167313		0.449806	0.310253	-0.660232	0.149407	-0.134288	-0.192094	1.06924	-0.0823434	0.088045	0.238045
		Fe2+ endmember		130.155	N/m		3.43	101						0.5	0.5	0.0441942	0.5	11.3137		0.0883883		0.382322	0.27658	-0.857946	0.164798	-0.149296	-0.211884	0.736209	-0.101571	0.0747775	0.224778
		Fe3+ endmember		229.26	N/m		1.56	216						0.6	0.4	0.0161909	0.4	24.7053		0.0404772		0.327936	0.246952	-1.09055	0.174259	-0.158636	-0.224047	0.506096	-0.122492	0.0619926	0.211993
														0.7	0.3	0.00443655	0.3	67.6201		0.0147885		0.284447	0.221455	-1.38334	0.179368	-0.163718	-0.230616	0.334649	-0.147474	0.0493519	0.199352
		T		1669.85	℃									0.8	0.2	0.000715542	0.2	279.508		0.00357771		0.249821	0.199885	-1.79104	0.181606	-0.165952	-0.233494	0.200172	-0.181284	0.036288	0.186288
				1943	K									0.9	0.1	3.16228e-05	0.1	3162.28		0.000316228		0.222215	0.181813	-2.48484	0.182258	-0.166603	-0.234332	0.0909154	-0.238187	0.0216549	0.171655
		P		8.5	GPa									0.99	0.01	1e-09	0.01	1e+07		1e-07		0.20202	0.168067	-4.78749	0.182322	-0.166667	-0.234413	0.00840336	-0.42662	0.00358504	0.153585
		K3/(K2 - K3)		-1.28571
		K3 - K2		3.5				Modeled results for eclogite at mantle potential temperature 1550 °C, pressure 8.5– 22.6 GPa
		K2 - K3		-3.5
		R0/(1 + R0)		0.166667	note: Fe3+/∑Fe				f	Fe3+/∑Fe	δcl		δcl		δcl		δcl		δcl		δcl		δcl		δcl		δcl
									T		1669.85		1677.85		1685.85		1692.85		1707.85		1722.85		1797.85		1876.85		1913.85	℃
		△57Fe(2l-2s)		0.0818275							1943		1951		1959		1966		1981		1996		2071		2150		2187	K
		△57Fe(3l-2l)		0.181261					P		8.5		9.2		9.9		10.6		11.9		13.4		14.9		18.7		22.6	GPa
		△57Fe(3s-2s)		0.11246					R0=0.136
									0.01	0.3755	0.2857		0.2826		0.2795		0.2767		0.2712		0.2653		0.2534		0.2371		0.2254
		δ0		0.15	‰				0.05	0.3592	0.2797		0.2767		0.2738		0.271		0.2657		0.2601		0.2486		0.2329		0.2216
									0.1	0.3393	0.2725		0.2696		0.2668		0.2642		0.2591		0.2537		0.2428		0.2279		0.2171
	Mantle adiabatic temperature 1550℃ profile (Katsura, 2022)								0.15	0.3199	0.2654		0.2627		0.26		0.2575		0.2527		0.2475		0.2372		0.223		0.2127
									0.2	0.3011	0.2586		0.256		0.2534		0.251		0.2464		0.2415		0.2318		0.2183		0.2085
		P-GPa	T(K)	T(℃)
		7.8	1935	1661.85					R0=0.2
		8.5	1943	1669.85					0.01	0.4693	0.2973		0.2941		0.2909		0.288		0.2823		0.2762		0.2635		0.2464		0.2343
		9.2	1951	1677.85					0.05	0.4519	0.2906		0.2875		0.2845		0.2816		0.2762		0.2703		0.2581		0.2417		0.2301
		9.9	1959	1685.85					0.1	0.4302	0.2824		0.2795		0.2766		0.2739		0.2687		0.2631		0.2516		0.236		0.2249
		10.6	1966	1692.85					0.15	0.4089	0.2745		0.2717		0.269		0.2664		0.2614		0.2561		0.2452		0.2304		0.2199
		11.2	1974	1700.85					0.2	0.3879	0.2668		0.2641		0.2615		0.2591		0.2544		0.2493		0.2391		0.2251		0.215
		11.9	1981	1707.85
		12.6	1988	1714.85					R0=0.3
		13.4	1996	1722.85					0.01	0.5702	0.3081		0.3049		0.3016		0.2986		0.2928		0.2866		0.2731		0.2554		0.2431
		13.7	1999	1725.85					0.05	0.5529	0.3008		0.2976		0.2945		0.2916		0.286		0.2801		0.2672		0.2502		0.2384
		13.7	2060	1786.85					0.1	0.5311	0.2918		0.2888		0.2858		0.2831		0.2778		0.2721		0.26		0.2438		0.2326
		14.1	2063	1789.85					0.15	0.5092	0.283		0.2802		0.2774		0.2748		0.2697		0.2644		0.2529		0.2377		0.227
		14.9	2071	1797.85					0.2	0.4873	0.2745		0.2718		0.2692		0.2667		0.2619		0.2569		0.2461		0.2317		0.2216
		15.6	2078	1804.85
		16.4	2085	1811.85					R0=0.4
		17.1	2092	1818.85					0.01	0.6388	0.3142		0.3109		0.3077		0.3046		0.2988		0.2925		0.2787		0.2607		0.2483
		17.9	2099	1825.85					0.05	0.6225	0.3064		0.3032		0.3001		0.2972		0.2916		0.2856		0.2724		0.2551		0.2432
		17.9	2142	1868.85					0.1	0.6016	0.2969		0.2939		0.2909		0.2882		0.2828		0.2772		0.2647		0.2484		0.2371
		18.7	2150	1876.85					0.15	0.5804	0.2876		0.2848		0.282		0.2794		0.2743		0.269		0.2572		0.2418		0.2312
		19.5	2157	1883.85					0.2	0.5589	0.2787		0.276		0.2733		0.2708		0.2661		0.261		0.25		0.2355		0.2254
		20.3	2165	1891.85
		21	2172	1898.85
		21.8	2180	1906.85
		22.6	2187	1913.85
		23.4	2194	1920.85
